# Supplementary material for: Biosensitivity and Theoretical Electronic Structure Investigations on 3-(2-Hydroxyphenyl)-2-iminothiazolidin-4-one and Its Zn2+ and Cd2+ Metal Complexes
Source: Hindawi journal article supplement (doi:10.1155/2021/8950357), 2021-10-31
Supplement: f1 [file 8950357.f1.zip]

Archive with 2 entries (2 files):
- 8950357.f1/Supplementary material S1 (1).doc
- 8950357.f1/Supplementary material S2 (1).doc
